# Supplementary material for: Infection of Fungi and Bacteria in Brain Tissue From Elderly Persons and Patients With Alzheimer’s Disease
Source: PubMed Central journal article supplement (PMC5976758; doi:10.3389/fnagi.2018.00159), 2018-05-24
Supplement: Table_1.pdf [file Table_1.pdf]

Supplementary table I. Summary of AD patients and controls subjects.

| Patients | Age | Gender | Brain region          | Braak TAU                      |
|----------|-----|--------|-----------------------|--------------------------------|
| AD1      | 80  | Female | FC and ERH            | 5                              |
| AD2      | 84  | Female | FC and ERH            | 5                              |
| AD3      | 79  | Female | FC and ERH            | 6                              |
| AD4      | 81  | Female | FC and ERH            | 6                              |
| AD5      | 87  | Male   | FC and ERH            | 5                              |
| AD6      | 92  | Male   | FC and ERH            | 6                              |
| AD7      | 81  | Male   | FC and ERH            | 5                              |
| AD8      | 87  | Female | FC and ERH            | 6                              |
| AD9      | 86  | Female | FC and ERH            | 5                              |
| AD10     | 62  | Male   | FC and ERH            | 5                              |
| AD11     | 83  | Female | ERH                   | Unknown                        |
| Controls |     |        |                       | Systemic diseases              |
| C1       | 56  | Male   | ERH                   | Unknown                        |
| C2       | 48  | Female | ERH                   | Unknown                        |
| C3       | 63  | Male   | ERH                   | Adenocarcinoma of the pancreas |
| C4       | 55  | Female | ERH                   | Arterial hypertension          |
| C5       | 62  | Female | ERH                   | Myelodysplastic syndrome       |
| C6       | 84  | Male   | ERH                   | Cardiomyopathy                 |
| C7       | 37  | Female | ERH                   | Sepsis                         |
| C8       | 54  | Male   | ERH                   | Ischemic cardiopathy           |
| C9       | 59  | Female | ERH                   | Acute pancreatitis             |
| C10      | 53  | Male   | FC<br>ERH<br>MD<br>SC | Unknown                        |
| C11      | 78  | Male   | FC<br>ERH<br>MD<br>SC | Unknown                        |
| C12      | 74  | Female | FC<br>ERH<br>MD<br>SC | Unknown                        |
| C13      | 83  | Female | FC<br>ERH<br>MD<br>SC | Unknown                        |
| C14      | 89  | Male   | GFS                   | Urosepsis                      |
| C15      | 90  | Female | GFS                   | Possible infection             |
| C16      | 87  | Male   | CP                    | Unknown                        |

FC: Frontal cortex; ERH : Entorhinal cortex; MD: Medulla; SC: Spinal cord; GFS: Superior Frontal cortex; PC: Parietal cortex
