# Supplementary material for: Infection of Fungi and Bacteria in Brain Tissue From Elderly Persons and Patients With Alzheimer’s Disease
Source: PubMed Central journal article supplement (PMC5976758; doi:10.3389/fnagi.2018.00159), 2018-05-24
Supplement: Table_2.pdf [file Table_2.pdf]

Supplementary table II. Representation of fungal species over 1 % from Frontal cortex brain region of ten AD patient

| AD1                                                          | AD2                                                          | AD3                                                          | AD4                                                         | AD5                                                          |
|--------------------------------------------------------------|--------------------------------------------------------------|--------------------------------------------------------------|-------------------------------------------------------------|--------------------------------------------------------------|
| Original paired reads :213462<br>Joined sequences (%): 97.9  | Original paired reads :260368<br>Joined sequences (%): 98.4  | Original paired reads : 248062<br>Joined sequences (%): 97.8 | Original paired reads :223155<br>Joined sequences (%): 97.8 | Original paired reads : 209034<br>Joined sequences (%): 98.6 |
| <i>Chromelosporium carneum</i> 65.9                          | <i>Uncultured fungus clone S24T_41</i> 18.4                  | <i>Uncultured fungus clone S24T_41</i> 21.5                  | <i>Uncultured fungus clone S24T_41</i> 16.6                 | <i>Uncultured fungus clone S24T_41</i> 20.9                  |
| <i>Malassezia_sp_HM_2008</i> 12.8                            | <i>Xylaria curta</i> 9.7                                     | <i>Emericella nidulans</i> 16.8                              | <i>Pleurothecium_sp_LXS_2012</i> 16.5                       | <i>Uncultured Basidiomycota</i> 11.0                         |
| <i>Uncultured fungus clone S24T_41</i> 5.4                   | <i>Uncultured Basidiomycota</i> 8.2                          | <i>Candida deformans</i> 8.7                                 | <i>Candida deformans</i> 6.7                                | <i>Candida deformans</i> 8.5                                 |
| <i>Candida deformans</i> 2.2                                 | <i>Candida deformans</i> 7.5                                 | <i>Botrytis cinerea</i> 1.6                                  | <i>Uncultured Basidiomycota</i> 1.7                         | <i>Davidiella tassiana</i> 6.4                               |
|                                                              | <i>Uncultured soil fungus</i> 5.5                            | <i>Uncultured fungus clone S110T_52</i> 1.3                  | <i>Botrytis cinerea</i> 1.2                                 | <i>Cryptococcus magnus</i> 2.9                               |
|                                                              | <i>Candida zeylanoides</i> 3.1                               | <i>Uncultured Basidiomycota</i> 1.1                          | <i>Uncultured fungus clone S110T_52</i> 1.0                 | <i>Botrytis cinerea</i> 1.6                                  |
|                                                              | <i>Botrytis cinerea</i> 1.4                                  | <i>Alternaria alternata</i> 1.5                              | <i>Alternaria alternata</i> 1.1                             | <i>Alternaria alternata</i> 1.4                              |
|                                                              | <i>Uncultured fungus clone S110T_52</i> 1.1                  |                                                              |                                                             | <i>Uncultured fungus clone S110T_52</i> 1.3                  |
| AD6                                                          | AD7                                                          | AD8                                                          | AD9                                                         | AD10                                                         |
| Original paired reads : 241821<br>Joined sequences (%): 98.1 | Original paired reads : 210396<br>Joined sequences (%): 98.2 | Original paired reads :359221<br>Joined sequences (%): 97.2  | Original paired reads :147296<br>Joined sequences (%): 97.7 | Original paired reads : 361090<br>Joined sequences (%): 97.8 |
| <i>Uncultured fungus clone S24T_41</i> 25.5                  | <i>Uncultured Basidiomycota</i> 19.3                         | <i>Uncultured fungus clone S24T_41</i> 20.8                  | <i>Uncultured fungus clone S24T_41</i> 22.2                 | <i>Emericella nidulans</i> 35.4                              |
| <i>Candida deformans</i> 10.4                                | <i>Uncultured fungus clone S24T_41</i> 15.7                  | <i>Candida deformans</i> 8.5                                 | <i>Emericella nidulans</i> 9.1                              | <i>uncultured Basidiomycota</i> 32.8                         |
| <i>Uncultured Basidiomycota</i> 4.2                          | <i>Candida deformans</i> 6.4                                 | <i>Basidiomycota_sp_D3</i> 3.9                               | <i>Candida deformans</i> 9.1                                | <i>Xeromyces bisporus</i> 23.3                               |
| <i>Botrytis cinerea</i> 1.9                                  | <i>Botrytis cinerea</i> 1.2                                  | <i>Botrytis cinerea</i> 1.6                                  | <i>Candida parapsilosis</i> 3.2                             |                                                              |
| <i>Alternaria alternata</i> 1.7                              | <i>Alternaria alternata</i> 1.1                              | <i>Uncultured fungus clone S110T_52</i> 1.3                  | <i>Acremonium_sp_JJP_2009a</i> 2.7                          |                                                              |
| <i>Uncultured fungus clone S110T_52</i> 1.6                  |                                                              | <i>Uncultured Basidiomycota</i> 1.0                          | <i>Botrytis cinerea</i> 1.7                                 |                                                              |
| <i>Uncultured Basidiomycota</i> 1.3                          |                                                              | <i>Alternaria alternata</i> 1.4                              | <i>Uncultured fungus clone S110T_52</i> 1.4                 |                                                              |
| <i>uncultured malassezia</i> 1.1                             |                                                              |                                                              | <i>Uncultured Basidiomycota</i> 1.1                         |                                                              |
| <i>Alternaria tenuissima</i> 1.1                             |                                                              |                                                              | <i>Alternaria alternata</i> 1.5                             |                                                              |

Supplementary table II. Representation of fungal species over 1 % from Frontal cortex brain region of ten AD patient
