# Supplementary material for: Infection of Fungi and Bacteria in Brain Tissue From Elderly Persons and Patients With Alzheimer’s Disease
Source: PubMed Central journal article supplement (PMC5976758; doi:10.3389/fnagi.2018.00159), 2018-05-24
Supplement: Table_3.pdf [file Table_3.pdf]

Supplementary table III. Common fungal species detected by Sanger and NGS from ten AD patients.

| Patients | Common species                                                                     |
|----------|------------------------------------------------------------------------------------|
| AD1      | <i>Cryptococcus magnus</i> , <i>Cladosporium sp</i> , <i>Uncultured malassezia</i> |
| AD2      | <i>Cladosporium sp</i>                                                             |
| AD3      | <i>Uncultured malassezia</i>                                                       |
| AD4      |                                                                                    |
| AD5      | <i>Alternaria alternata</i>                                                        |
| AD6      |                                                                                    |
| AD7      | <i>Cladosporium sp</i>                                                             |
| AD8      | <i>Malassezia globosa</i> , <i>Uncultured malassezia</i>                           |
| AD9      | <i>Uncultured aureibasidium</i>                                                    |
| AD10     | <i>Sporobolomyces sp</i>                                                           |
