# Supplementary material for: Infection of Fungi and Bacteria in Brain Tissue From Elderly Persons and Patients With Alzheimer’s Disease
Source: PubMed Central journal article supplement (PMC5976758; doi:10.3389/fnagi.2018.00159), 2018-05-24
Supplement: Table_4.pdf [file Table_4.pdf]

Supplementary table IV. Common genera obtained by NGS in samples of ERH and FC from AD patients.

| Patients number in this work FC | Patients number in previous work ERH | Common genera                                                      |
|---------------------------------|--------------------------------------|--------------------------------------------------------------------|
| AD1                             | ND                                   |                                                                    |
| AD2                             | AD2                                  | <i>Alternaria, Botrytis, Candida, Malassezia</i>                   |
| AD3                             | AD3                                  | <i>Alternaria, Botrytis, Candida, Malassezia</i>                   |
| AD4                             | AD4                                  | <i>Alternaria, Botrytis, Candida, Malassezia</i>                   |
| AD5                             | AD5                                  | <i>Alternaria, Basidiomycota, Botrytis, Davidiella, Malassezia</i> |
| AD6                             | AD6                                  | <i>Alternaria, Botrytis, Candida, Malassezia</i>                   |
| AD7                             | AD7                                  | <i>Alternaria, Botrytis, Candida, Malassezia</i>                   |
| AD8                             | AD8                                  | <i>Alternaria, Botrytis, Candida, Malassezia</i>                   |
| AD9                             | ND                                   |                                                                    |
| AD10                            | AD9                                  |                                                                    |

ND: Not done
