# Supplementary material for: Infection of Fungi and Bacteria in Brain Tissue From Elderly Persons and Patients With Alzheimer’s Disease
Source: PubMed Central journal article supplement (PMC5976758; doi:10.3389/fnagi.2018.00159), 2018-05-24
Supplement: Table_5.pdf [file Table_5.pdf]

Supplementary table V. Representation of fungal species over 1 % from twelve control brains.

| C1                                                                                                                                                                                                                                                                                                                                                                                                    | C2                                                                                                                                                                                                                                                                                                                                                                                                                                                                          | C3                                                                                                                                                                                                                                                                                                                                                                                | C4                                                                                                                                                                                                                                                                                                                                                                                       | C5                                                                                                                                                                                                                                                                                                                                                                                                                     | C6                                                                                                                                                                                                                                                                                                                                                                                        |
|-------------------------------------------------------------------------------------------------------------------------------------------------------------------------------------------------------------------------------------------------------------------------------------------------------------------------------------------------------------------------------------------------------|-----------------------------------------------------------------------------------------------------------------------------------------------------------------------------------------------------------------------------------------------------------------------------------------------------------------------------------------------------------------------------------------------------------------------------------------------------------------------------|-----------------------------------------------------------------------------------------------------------------------------------------------------------------------------------------------------------------------------------------------------------------------------------------------------------------------------------------------------------------------------------|------------------------------------------------------------------------------------------------------------------------------------------------------------------------------------------------------------------------------------------------------------------------------------------------------------------------------------------------------------------------------------------|------------------------------------------------------------------------------------------------------------------------------------------------------------------------------------------------------------------------------------------------------------------------------------------------------------------------------------------------------------------------------------------------------------------------|-------------------------------------------------------------------------------------------------------------------------------------------------------------------------------------------------------------------------------------------------------------------------------------------------------------------------------------------------------------------------------------------|
| Original paired reads:233188<br>Joined sequences(%):92.8                                                                                                                                                                                                                                                                                                                                              | Original paired reads:219891<br>Joined sequences(%):97.8                                                                                                                                                                                                                                                                                                                                                                                                                    | Original paired reads:247621<br>Joined sequences(%):98.8                                                                                                                                                                                                                                                                                                                          | Original paired reads:187800<br>Joined sequences(%):97.7                                                                                                                                                                                                                                                                                                                                 | Original paired reads:205726<br>Joined sequences(%):98.1                                                                                                                                                                                                                                                                                                                                                               | Original paired reads:204983<br>Joined sequences(%):95.4                                                                                                                                                                                                                                                                                                                                  |
| <i>Candida deformans</i> 21.9<br><i>Uncultured Phoma</i> 13.1<br><i>Botrytis cinerea</i> 12.9<br><i>Uncultured fungus clone</i><br><i>038A45644</i> 6.7<br><i>Uncultured fungus clone</i><br><i>S24T_41</i> 5.6<br><i>Uncultured fungus clone</i><br><i>MOTU_4160</i> 2.3                                                                                                                             | <i>Candida deformans</i> 16.1<br><i>Uncultured Ascomycota</i> 12.1<br><i>Botrytis cinerea</i> 9.6<br><i>Uncultured Phoma</i> 9.6<br><i>Rhodotorula minuta</i> 8.9<br><i>Rhizophydium_sp_PL_157</i> 6.6<br><i>Uncultured fungus clone</i><br><i>038A45644</i> 4.9<br><i>Uncultured fungus clone</i><br><i>S24T_41</i> 4.2<br><i>Uncultured fungus clone</i><br><i>MOTU_4160</i> 1.7                                                                                          | <i>Fusarium oxysporum</i> 35.2<br><i>Aspergillus niger</i> 12.8<br><i>Candida deformans</i> 11.5<br><i>Uncultured Phoma</i> 6.9<br><i>Botrytis cinerea</i> 6.8<br><i>Uncultured fungus clone</i><br><i>038A45644</i> 3.5<br><i>Uncultured fungus clone</i><br><i>S24T_41</i> 2.9<br><i>Uncultured Basidiomycota</i> 1.7<br><i>Uncultured fungus clone</i><br><i>MOTU_4160</i> 1.2 | <i>Fusarium oxysporum</i> 26.6<br><i>Candida deformans</i> 12.6<br><i>Acremonium_sp_JJP_2009a</i> 8.2<br><i>Botrytis cinerea</i> 7.5<br><i>Uncultured Phoma</i> 7.5<br><i>Uncultured fungus clone</i><br><i>038A45644</i> 6.8<br><i>Uncultured fungus clone</i><br><i>S24T_41</i> 3.3<br><i>Uncultured Chytridiomycota</i> 3.0<br><i>Uncultured fungus clone</i><br><i>MOTU_4160</i> 1.3 | <i>Aspergillus niger</i> 20.5<br><i>Candida deformans</i> 11.5<br><i>Uncultured Basidiomycota</i> 11.1<br><i>Acremonium_sp_JJP_2009a</i> 10.4<br><i>Uncultured Phoma</i> 6.9<br><i>Uncultured Phoma</i> 6.8<br><i>Botrytis cinerea</i> 6.8<br><i>Uncultured fungus clone</i><br><i>038A45644</i> 3.5<br><i>Uncultured fungus clone</i><br><i>S24T_41</i> 3.0<br><i>Uncultured fungus clone</i><br><i>MOTU_4160</i> 1.2 | <i>Aspergillus penicillioides</i> 33.9<br><i>Candida deformans</i> 12.6<br><i>Botrytis cinerea</i> 7.5<br><i>Uncultured Phoma</i> 7.5<br><i>Uncultured Basidiomycota</i> 5.1<br><i>Cladonia fimbriata</i> 4.1<br><i>Uncultured fungus clone</i><br><i>038A45644</i> 3.8<br><i>Uncultured fungus clone</i><br><i>S24T_41</i> 3.3<br><i>Uncultured fungus clone</i><br><i>MOTU_4160</i> 1.3 |
| C7                                                                                                                                                                                                                                                                                                                                                                                                    | C8                                                                                                                                                                                                                                                                                                                                                                                                                                                                          | C9                                                                                                                                                                                                                                                                                                                                                                                | C14                                                                                                                                                                                                                                                                                                                                                                                      | C15                                                                                                                                                                                                                                                                                                                                                                                                                    | C16                                                                                                                                                                                                                                                                                                                                                                                       |
| Original paired reads:833385<br>Joined sequences(%):98.7                                                                                                                                                                                                                                                                                                                                              | Original paired reads:224413<br>Joined sequences(%):97.2                                                                                                                                                                                                                                                                                                                                                                                                                    | Original paired reads:184818<br>Joined sequences(%):96.3                                                                                                                                                                                                                                                                                                                          | Original paired reads:200703<br>Joined sequences(%):97.3                                                                                                                                                                                                                                                                                                                                 | Original paired reads:300056<br>Joined sequences(%):97.1                                                                                                                                                                                                                                                                                                                                                               | Original paired reads:336317<br>Joined sequences(%):97.7                                                                                                                                                                                                                                                                                                                                  |
| <i>Candida deformans</i> 17.1<br><i>uncultured Ascomycota</i> 8.3<br><br><i>Botrytis cinerea</i> 4.6<br><br><i>Uncultured Phoma</i> 4.6<br><i>Uncultured fungus clone</i><br><i>S24T_41</i> 4.4<br><br><i>unculturedBasidiomycota</i> 4.3<br><br><i>Candida_sp,</i> 4.0<br><i>Cryptococcus magnus</i> 2.7<br><i>Davidiella tassiana</i> 2.3<br><i>Uncultured fungus clone</i><br><i>038A45644</i> 2.3 | <i>Davidiella tassiana</i> 18.6<br><i>Candida deformans</i> 10.5<br><br><i>Uncultured Phoma</i> 6.3<br><i>Botrytis cinerea</i> 6.2<br><br><i>Malassezia_sp_HM_2008</i> 3.8<br><br><i>Fungal_endophyte_sp_O26_3333</i> 3.8<br><i>Uncultured fungus clone</i><br><i>038A45644</i> 3.2<br><i>Uncultured fungus clone</i><br><i>S24T_41</i> 2.7<br><i>Fusarium oxysporum</i> 2.6<br><br><i>Ascomycota_sp_I406</i> 2.5<br><i>Uncultured fungus clone</i><br><i>MOTU_4160</i> 1.2 | <i>Candida deformans</i> 18.7<br><i>Botrytis cinerea</i> 11.1<br><br><i>Uncultured Phoma</i> 11.1<br><i>Uncultured fungus clone</i><br><i>038A45644</i> 5.7<br><i>Uncultured fungus clone</i><br><i>S24T_41</i> 4.8<br><i>Uncultured fungus clone</i><br><i>MOTU_4160</i> 2.0<br><br><i>Acremonium_sp_JJP_2009a</i> 1.9                                                           | <i>Candida deformans</i> 45.1<br><i>unculturedsoil_fungus</i> 12.1<br><br><i>Botrytis cinerea</i> 5.9<br><i>Uncultured fungus clone</i><br><i>S24T_41</i> 4.7<br><br><i>Uncultured fungus clone</i><br><i>S346</i> 2.9                                                                                                                                                                   | <i>Candida deformans</i> 36.1<br><i>Botrytis cinerea</i> 4.7<br><i>Uncultured fungus clone</i><br><i>S24T_41</i> 3.8<br><br><i>Uncultured fungus clone</i><br><i>S346</i> 2.3                                                                                                                                                                                                                                          | <i>Candida deformans</i> 44.7<br><i>Candida_sp</i> 11.2<br><br><i>Davidiella tassiana</i> 7.1<br><br><i>Botrytis cinerea</i> 5.9<br><i>Uncultured fungus clone</i><br><i>S24T_41</i> 4.7<br><br><i>Uncultured fungus clone</i><br><i>S346</i> 2.8                                                                                                                                         |
