# Supplementary material for: Infection of Fungi and Bacteria in Brain Tissue From Elderly Persons and Patients With Alzheimer’s Disease
Source: PubMed Central journal article supplement (PMC5976758; doi:10.3389/fnagi.2018.00159), 2018-05-24
Supplement: Table_6.pdf [file Table_6.pdf]

Supplementary table VI. . Representation of fungal species > 1% from four regions of four control brains.

| C10 FC                                                                                                                                                                                                                                                                                                                                                              | C10 ERH                                                                                                                                                                                                                                                                                                                          | C10MD                                                                                                                                                                                                                                                                                                                                                                                                                        | C10SC                                                                                                                                                                                                                                                                                                                                                                                      |
|---------------------------------------------------------------------------------------------------------------------------------------------------------------------------------------------------------------------------------------------------------------------------------------------------------------------------------------------------------------------|----------------------------------------------------------------------------------------------------------------------------------------------------------------------------------------------------------------------------------------------------------------------------------------------------------------------------------|------------------------------------------------------------------------------------------------------------------------------------------------------------------------------------------------------------------------------------------------------------------------------------------------------------------------------------------------------------------------------------------------------------------------------|--------------------------------------------------------------------------------------------------------------------------------------------------------------------------------------------------------------------------------------------------------------------------------------------------------------------------------------------------------------------------------------------|
| Originalpairedreads:178721<br>Joined sequences(%):98,5                                                                                                                                                                                                                                                                                                              | Original paired reads:160135<br>Joined sequences(%):98,7                                                                                                                                                                                                                                                                         | Original paired reads:207232<br>Joined sequences(%):98,3                                                                                                                                                                                                                                                                                                                                                                     | Original paired reads:209528<br>Joined sequences(%):98,6                                                                                                                                                                                                                                                                                                                                   |
| <i>Candida deformans</i> 23,1<br><i>Uncultured Phoma</i> 13,80<br><i>Botrytis cinerea</i> 12,10<br><i>Uncultured fungus clone 038A45644</i> 7<br><i>Uncultured fungus clone S24T_</i> 5,90<br><i>Uncultured fungus clone MOTU_4160</i> 2,50<br><i>Uncultured Basidiomycota</i> 2,32                                                                                 | <i>Uncultured Ascomycota</i> 36,36<br><i>Rhizophydiales_sp</i> 12,36<br><i>Botrytis cinerea</i> 6,6<br><i>Candida deformans</i> 11<br><i>Uncultured Phoma</i> 6,60<br><i>Uncultured fungus clone 038A45644</i> 3,4<br><i>Uncultured fungus clone S24T_</i> 2,90<br><i>Uncultured fungus clone MOTU_4160</i> 1,20                 | <i>Candida deformans</i> 13,40<br><i>Fusarium oxysporum</i> 10,09<br><i>Uncultured Phoma</i> 8,00<br><i>Botrytis cinerea</i> 7,00<br><i>Uncultured fungus clone 038A45644</i> 4,1<br><i>Uncultured fungus clone S24T_</i> 3,50<br><i>Uncultured Basidiomycota</i> 2,77<br><i>Candida cellae</i> 1,69<br><i>Uncultured fungus clone MOTU_4160</i> 1,40                                                                        | <i>Uncultured Basidiomycota</i> 22,80<br><i>Acremonium_sp</i> 12,83<br><i>Candida deformans</i> 10,00<br><i>Davidiella tassiana</i> 8,36<br><i>Phaeosphaeriaceae_sp</i> 8,25<br><i>Uncultured Phoma</i> 6,00<br><i>Botrytis cinerea</i> 5,30<br><i>Uncultured fungus clone 038A45644</i> 3,1<br><i>Uncultured fungus clone S24T_</i> 2,60<br><i>Uncultured fungus clone MOTU_4160</i> 1,10 |
| C11FC                                                                                                                                                                                                                                                                                                                                                               | C11ERH                                                                                                                                                                                                                                                                                                                           | C11MD                                                                                                                                                                                                                                                                                                                                                                                                                        | C11SC                                                                                                                                                                                                                                                                                                                                                                                      |
| Original paired reads:179243<br>Joined sequences(%):99                                                                                                                                                                                                                                                                                                              | Original paired reads:215288<br>Joined sequences(%):97,8                                                                                                                                                                                                                                                                         | Original paired reads:188692<br>Joined sequences(%):97,3                                                                                                                                                                                                                                                                                                                                                                     | Original paired reads:200505<br>Joined sequences(%):96,6                                                                                                                                                                                                                                                                                                                                   |
| <i>Uncultured Ascomycota</i> 76,78<br><i>Candida deformans</i> 3,20<br><i>Uncultured Phoma</i> 1,90<br><i>Aspergillus_niger</i> 1,86<br><i>Botrytis cinerea</i> 1,70<br><i>Davidiella_tassiana</i> 1,32<br><i>Lasiodiplodia_theobromae</i> 1,31<br><i>Rhodotorula ingeniiosa</i> 1,20<br><i>Eupenicillium_sp</i> 1,01<br><i>Uncultured fungus clone 038A45644</i> 1 | <i>Phoma_sp</i> 16,00<br><i>Xylaria_curta</i> 13,75<br><i>Penicillium aurantiogriseum</i> 11,29<br><i>Candida deformans</i> 8,90<br><i>Davidiella_tassiana</i> 7,31<br><i>Uncultured Phoma</i> 5,40<br><i>Botrytis cinerea</i> 4,70<br><i>Uncultured fungus clone 038A45644</i> 2,7<br><i>Uncultured fungus clone S24T_</i> 2,30 | <i>Davidiella tassiana</i> 20,36<br><i>Aspergillus niger</i> 11,97<br><i>Candida deformans</i> 10,5<br><i>Uncultured Ascomycota</i> 8,09<br><i>Uncultured Phoma</i> 6,30<br><i>Botrytis cinerea</i> 5,5<br><i>Acremonium_sp</i> 4,56<br><i>uncultured Chytridiomycota</i> 4,26<br><i>Uncultured fungus clone 038A45644</i> 3,1<br><i>Uncultured fungus clone S24T_</i> 2,70<br><i>Uncultured fungus clone MOTU_4160</i> 1,10 | <i>Candida deformans</i> 10,40<br><i>Aspergillus niger</i> 8,97<br><i>Uncultured Phoma</i> 6,20<br><i>Botrytis cinerea</i> 5,60<br><i>Uncultured Basidiomycota</i> 3,30<br><i>Uncultured fungus clone 038A45644</i> 3,1<br><i>Uncultured fungus clone S24T_</i> 2,70<br><i>Rhizophydiales_sp</i> 2,43<br><i>Uncultured fungus clone MOTU_4160</i> 1,10<br><i>Candida glabrata</i> 1,09     |
| C12FC                                                                                                                                                                                                                                                                                                                                                               | C12ERH                                                                                                                                                                                                                                                                                                                           | C12MD                                                                                                                                                                                                                                                                                                                                                                                                                        | C12SC                                                                                                                                                                                                                                                                                                                                                                                      |
| Original paired reads:193250                                                                                                                                                                                                                                                                                                                                        | Original paired reads:178600                                                                                                                                                                                                                                                                                                     | Original paired reads:198565                                                                                                                                                                                                                                                                                                                                                                                                 | Original paired reads:173107                                                                                                                                                                                                                                                                                                                                                               |

| Joined sequences(%) :98,8                |       | Joined sequences(%) :98,9                |       | Joined sequences(%) :98,9                |       | Joined sequences(%) :98,4                |       |
|------------------------------------------|-------|------------------------------------------|-------|------------------------------------------|-------|------------------------------------------|-------|
| <i>Davidiella tassiana</i>               | 36,52 | <i>Davidiella tassiana</i>               | 34,62 | <i>Davidiella tassiana</i>               | 43,15 | <i>Uncultured</i>                        |       |
| <i>Candida deformans</i>                 | 11,90 | <i>Acremonium_sp</i>                     | 11,32 | <i>Candida deformans</i>                 | 10,70 | <i>Basidiomycota</i>                     | 32,67 |
| <i>Uncultured Phoma</i>                  | 7,10  | <i>Candida deformans</i>                 | 9,80  | <i>Aspergillus niger</i>                 | 6,52  | <i>Davidiella tassiana</i>               | 26,92 |
| <i>Botrytis cinerea</i>                  | 6,2   | <i>Uncultured Phoma</i>                  | 5,80  | <i>Uncultured Phoma</i>                  | 6,40  | <i>unculturedsoil fungus</i>             | 12,13 |
| <i>Uncultured fungus clone 038A45644</i> | 3,6   | <i>Botrytis cinerea</i>                  | 5,10  | <i>Botrytis cinerea</i>                  | 4,50  | <i>Candida deformans</i>                 | 5,70  |
| <i>Uncultured Rhizopogon</i>             | 3,30  | <i>Uncultured Basidiomycota</i>          | 3,77  | <i>Uncultured fungus clone 038A45644</i> | 3,3   | <i>Uncultured Phoma</i>                  | 3,40  |
| <i>Uncultured fungus clone S24T_</i>     | 3,10  | <i>root_associated_fungal_sp_EP1_6</i>   | 3,38  | <i>Uncultured Rhizopogon</i>             | 2,90  | <i>Botrytis cinerea</i>                  | 3,00  |
| <i>Uncultured fungus clone MOTU_4160</i> | 1,30  | <i>Rhizophydium Sp</i>                   | 3,01  | <i>Uncultured fungus clone S24T_</i>     | 2,80  | <i>Acremonium sp</i>                     | 1,82  |
| <i>Xylaria curta</i>                     | 1,20  | <i>Uncultured fungus clone 038A45644</i> | 2,9   | <i>Acremonium_sp</i>                     | 2,34  | <i>Uncultured fungus clone 038A45644</i> | 1,7   |
|                                          |       | <i>Uncultured Rhizopogon</i>             | 2,60  | <i>Uncultured fungus clone MOTU_4160</i> | 1,10  | <i>Uncultured</i>                        |       |
|                                          |       | <i>Uncultured fungus clone S24T_</i>     | 2,50  |                                          |       | <i>Rhizopogon</i>                        | 1,50  |
|                                          |       | <i>unculturedsoil_fungus</i>             | 1,28  |                                          |       | <i>Uncultured fungus clone S24T_</i>     | 1,50  |
|                                          |       | <i>Uncultured fungus clone MOTU_4160</i> | 1,00  |                                          |       |                                          |       |
|                                          |       |                                          |       |                                          |       |                                          |       |
| C13FC                                    |       | C13ERH                                   |       | C13MD                                    |       | C13SC                                    |       |
| Original paired reads:150780             |       | Original paired reads:175759             |       | Original paired reads:190566             |       | Original paired reads:178420             |       |
| Joined sequences(%) :98,6                |       | Joined sequences(%) :98,9                |       | Joined sequences(%) :98                  |       | Joined sequences(%) :97,5                |       |
| <i>Xylaria curta</i>                     | 21,83 | <i>Davidiella tassiana</i>               | 44,76 | <i>Aspergillus niger</i>                 | 11,69 | <i>Davidiella tassiana</i>               | 38,87 |
| <i>Davidiella tassiana</i>               | 13,54 | <i>Candida deformans</i>                 | 11,10 | <i>Candida deformans</i>                 | 11,50 | <i>Candida deformans</i>                 | 14,20 |
| <i>Anthracoidea_aspera</i>               | 12,28 | <i>Uncultured Phoma</i>                  | 6,60  | <i>uncultured</i>                        |       | <i>Uncultured Phoma</i>                  | 8,50  |
| <i>unculturedsoil_fungus</i>             | 8,83  | <i>Botrytis cinerea</i>                  | 5,80  | <i>Basidiomycota</i>                     | 9,71  | <i>Botrytis cinerea</i>                  | 7,5   |
| <i>Candida deformans</i>                 | 6,10  | <i>Uncultured fungus clone 038A45644</i> | 3,4   | <i>Uncultured Phoma</i>                  | 6,90  | <i>Uncultured fungus clone 038A45644</i> | 4,3   |
| <i>Uncultured Phoma</i>                  | 3,60  | <i>Uncultured Rhizopogon</i>             | 3,00  | <i>Acremonium_sp</i>                     | 6,85  | <i>Uncultured</i>                        |       |
| <i>Botrytis cinerea</i>                  | 3,10  | <i>Uncultured fungus clone 41</i>        | 2,90  | <i>Botrytis cinerea</i>                  | 6,00  | <i>Rhizopogon</i>                        | 3,80  |
| <i>Physoderma_maydis</i>                 | 2,94  | <i>Xylaria curta</i>                     | 2,13  | <i>Uncultured fungus clone 038A45644</i> | 3,5   | <i>Uncultured fungus clone S24T_</i>     | 3,70  |
| <i>Uncultured fungus clone 038A45644</i> | 1,80  | <i>Phoma_sp</i>                          | 1,93  | <i>Uncultured Rhizopogon</i>             | 3,00  | <i>Uncultured fungus clone MOTU_4160</i> | 1,50  |
| <i>Aspergillus caesiellus</i>            | 1,77  |                                          |       | <i>Uncultured fungus clone S24T_</i>     | 3,00  |                                          |       |
| <i>Uncultured Rhizopogon</i>             | 1,60  |                                          |       | <i>Uncultured fungus clone MOTU_4160</i> | 1,20  |                                          |       |
| <i>Uncultured fungus clone S24T_</i>     | 1,60  |                                          |       | <i>Uncultured soil fungus</i>            | 8,3   |                                          |       |
