# Supplementary material for: Infection of Fungi and Bacteria in Brain Tissue From Elderly Persons and Patients With Alzheimer’s Disease
Source: PubMed Central journal article supplement (PMC5976758; doi:10.3389/fnagi.2018.00159), 2018-05-24
Supplement: Table_7.pdf [file Table_7.pdf]

Supplementary table VII. Bacterial species detected by NGS in ten AD patients.

| AD1                             | AD2                                     | AD3                                | AD4                              | AD5                              |
|---------------------------------|-----------------------------------------|------------------------------------|----------------------------------|----------------------------------|
| Number of reads :224151         | Number of reads:210019                  | Number of reads:185208             | Number of reads:204746           | Number of reads:206408           |
| Sequences joined : 95%          | Sequences joined :94,8%                 | Sequences joined :95,3%            | Sequences joined:95%             | Sequences joined:92,9%           |
| <i>Methylobacteriaceae</i> 21.0 | <i>Methylobacteriaceae</i> 33.6         | <i>Cupriavidus</i> 17.4            | <i>Methylobacteriaceae</i> 22.7  | <i>Methylobacteriaceae</i> 17.9  |
| <i>Cupriavidus</i> 13.3         | <i>Bradyrhizobiaceae</i> 11.1           | <i>Bradyrhizobiaceae</i> 12.5      | <i>Bradyrhizobiaceae</i> 9.6     | <i>Cupriavidus</i> 11.2          |
| <i>Staphylococcus</i> 8.1       | <i>Cupriavidus</i> 10.1                 | <i>Streptophyta</i> 12.0           | <i>Cupriavidus</i> 8.1           | <i>Sphingomonas</i> 9.2          |
| <i>Zoogloea</i> 7.8             | <i>Bifidobacterium adolescentis</i> 6.7 | <i>Methylobacteriaceae</i> 10.7    | <i>Zoogloea</i> 5.2              | <i>Sphingomonadales</i> 6.8      |
| <i>Azospira</i> 6.9             | <i>Sphingomonas</i> 4.7                 | <i>Comamonadaceae</i> 6.6          | <i>Acidovorax defluvii</i> 4.9   | <i>Prevotella copri</i> 4.7      |
| <i>Comamonadaceae</i> 5.8       | <i>Escherichia coli</i> 3.1             | <i>Sphingomonas</i> 5.1            | <i>Eubacterium bifforme</i> 4.8  | <i>Comamonadaceae</i> 4.7        |
| <i>Ruminococcus</i> 4.3         | <i>Acidovorax defluvii</i> 3.1          | <i>Roseburia</i> 4.3               | <i>Ruminococcaceae</i> 4.5       | <i>Acidimicrobiales</i> 4.4      |
| <i>Sphingomonadales</i> 3.8     | <i>Zoogloea</i> 3.0                     | <i>Sphingomonadales</i> 3.6        | <i>Sphingomonadales</i> 3.9      | <i>Bradyrhizobiaceae</i> 4.4     |
| <i>Corynebacterium</i> 2.5      | <i>Azospira</i> 2.5                     | <i>Rothia dentocariosa</i> 3.4     | <i>Sphingomonas</i> 3.7          | <i>Parabacteroides</i> 4.3       |
| <i>Acidovorax defluvii</i> 2.5  | <i>Halomonas</i> 2.2                    | <i>Staphylococcus</i> 3.1          | <i>Roseburia</i> 3.5             | <i>Acidovorax defluvii</i> 4.2   |
| <i>Kineosporiaceae</i> 2.0      | <i>Lachnospiraceae</i> 2.1              | <i>Acidovorax defluvii</i> 2.3     | <i>Veillonella dispar</i> 2.9    | <i>Azospira</i> 3.3              |
| <i>Bradyrhizobiaceae</i> 1.9    | <i>Micrococcus luteus</i> 1.8           | <i>Roseburia faecis</i> 2.1        | <i>Rhodobacter</i> 2.2           | <i>Prevotella</i> 2.5            |
| <i>Micrococcus luteus</i> 1.8   | <i>Corynebacterium</i> 1.3              | <i>Azospira</i> 1.9                | ZB2 2.1                          | <i>Cystobacterineae</i> 2.3      |
| <i>Burkholderiales</i> 1.4      | <i>Ralstonia</i> 1.3                    | <i>Lachnospiraceae</i> 1.5         | <i>Dialister</i> 2.1             | <i>Staphylococcus</i> 2.0        |
| <i>Comamonadaceae</i> 1.2       |                                         | <i>Rikenellaceae</i> 1.4           | <i>Streptococcus</i> 1.7         | <i>Prevotella nigrescens</i> 1.8 |
| <i>Rothia dentocariosa</i> 1.2  |                                         | <i>Propionibacterium acnes</i> 1.0 | <i>Prevotella copri</i> 1.3      | <i>Rikenellaceae</i> 1.8         |
| <i>Acetobacteraceae</i> 1.0     |                                         | ZB2 1.0                            | <i>Methylobacterium</i> 1.2      | <i>Lachnospira</i> 1.7           |
| <i>Rhizobiales</i> 1.0          |                                         |                                    | <i>Phascolarctobacterium</i> 1.2 | <i>Rhodoplanes elegans</i> 1.1   |
|                                 |                                         |                                    | <i>Hyphomonadaceae</i> 1.1       |                                  |

| AD6                                       | AD7                                     | AD8                                       | AD9                             | AD10                                      |
|-------------------------------------------|-----------------------------------------|-------------------------------------------|---------------------------------|-------------------------------------------|
| Number of reads :223350                   | Number of reads :192670                 | Number of reads :190446                   | Number of reads :205687         | Number of reads :256223                   |
| Sequences joined : 94,8%                  | Sequences joined : 94,7%                | Sequences joined : 94,8%                  | Sequences joined : 94,7%        | Sequences joined : 94,4%                  |
| <i>Methylobacteriaceae</i> 24.2           | <i>Methylobacteriaceae</i> 25.1         | <i>Methylobacteriaceae</i> 21.9           | <i>Methylobacteriaceae</i> 17.7 | <i>Prevotella copri</i> 14.7              |
| <i>Cupriavidus</i> 17.8                   | <i>Azospira</i> 12.,9                   | <i>Cupriavidus</i> 11.6                   | <i>Cupriavidus</i> 16.2         | <i>Lachnospira</i> 12.6                   |
| <i>Corynebacterium</i> 6.1                | <i>Streptophyta</i> 8.7                 | <i>Comamonadaceae</i> 8.6                 | <i>Bradyrhizobiaceae</i> 9.7    | <i>Comamonadaceae</i> 4.0                 |
| <i>Bradyrhizobiaceae</i> 5.9              | <i>Cupriavidus</i> 7.0                  | <i>Bifidobacterium adolescentis</i> 6.5   | <i>Prevotella copri</i> 8.3     | <i>Coriobacteriaceae</i> 3.9              |
| <i>Burkholderia</i> 5.0                   | <i>Mitochondria</i> 6.5                 | <i>Escherichia coli</i> 6.3               | <i>Comamonadaceae</i> 5.6       | <i>Staphylococcus</i> 3.9                 |
| <i>Rhodoplanes elegans</i> 4.4            | <i>Faecalibacterium prausnitzii</i> 5.8 | <i>Bradyrhizobiaceae</i> 5.5              | <i>Catenibacterium</i> 5.2      | <i>Roseburia</i> 3.8                      |
| <i>Ruminococcus bromii</i> 3.7            | <i>Prevotella copri</i> 3.7             | <i>Succinivibrio</i> 5.1                  | <i>Thermotogaceae</i> 5.0       | <i>Faecalibacterium prausnitzii</i> 3.8   |
| <i>Gemellaceae</i> 3.4                    | <i>Acidovorax defluvii</i> 3.1          | <i>Sphingomonadales</i> 4.2               | <i>Azospira</i> 4.2             | <i>Achromobacter</i> 3.8                  |
| <i>Sphingomonadales</i> 3.0               | <i>Comamonadaceae</i> 2.7               | <i>Staphylococcus</i> 2.6                 | <i>Rubellimicrobium</i> 4.1     | <i>Methylobacteriaceae</i> 3.7            |
| <i>Comamonadaceae</i> 2.6                 | <i>Anaerococcus</i> 2.5                 | <i>Chitinophagaceae</i> 2.5               | <i>Acidovorax defluvii</i> 3.9  | <i>Escherichia coli</i> 3.5               |
| <i>Corynebacterium kroppenstedtii</i> 2.5 | <i>Bradyrhizobiaceae</i> 2.5            | <i>Azospira</i> 2.3                       | <i>Streptococcus</i> 3.3        | <i>Rhizobiales</i> 3.4                    |
| <i>Micrococcus luteus</i> 2.5             | <i>Corynebacterium</i> 1.9              | A17 1.9                                   | <i>Amaricoccus</i> 2.6          | <i>Cupriavidus</i> 3.4                    |
| <i>Methylobacterium</i> 1.8               | <i>Sphingomonas</i> 1.6                 | <i>Corynebacterium kroppenstedtii</i> 1.8 | <i>Anaerococcus</i> 2.1         | <i>Dialister</i> 3.3                      |
| <i>Azospira</i> 1.8                       | <i>Methylobacterium</i> 1.3             | <i>Sphingomonas</i> 1.7                   | <i>Finegoldia</i> 1.3           | <i>Sutterella</i> 3.1                     |
| <i>Finegoldia</i> 1.7                     | <i>Betaproteobacteria</i> 1.2           | <i>Exiguobacterium</i> 1.4                |                                 | <i>Eubacterium bifforme</i> 2.8           |
| <i>Acidovorax defluvii</i> 1.4            | <i>Streptococcus</i> 1.1                | TM7-3 1.4                                 |                                 | <i>Corynebacterium kroppenstedtii</i> 2.4 |
| <i>Propionibacterium acnes</i> 1.3        |                                         | <i>Acetobacteraceae</i> 1.2               |                                 | <i>Streptococcus anginosus</i> 2.0        |
| <i>Sphingomonas</i> 1.1                   |                                         | <i>Fusobacterium</i> 1.2                  |                                 | <i>Streptococcus</i> 1.9                  |
|                                           |                                         | BA008 1.1                                 |                                 | <i>Azospira</i> 1.9                       |
|                                           |                                         | <i>Burkholderiales</i> 1.0                |                                 | <i>Kineosporiaceae</i> 1.5                |
|                                           |                                         |                                           |                                 | <i>Ruminococcaceae</i> 1.4                |
|                                           |                                         |                                           |                                 | <i>Corynebacterium kroppenstedtii</i> 1.3 |
|                                           |                                         |                                           |                                 | <i>Propionibacterium acnes</i> 1.2        |
|                                           |                                         |                                           |                                 | <i>Acidovorax defluvii</i> 1.1            |
