# Supplementary material for: Infection of Fungi and Bacteria in Brain Tissue From Elderly Persons and Patients With Alzheimer’s Disease
Source: PubMed Central journal article supplement (PMC5976758; doi:10.3389/fnagi.2018.00159), 2018-05-24
Supplement: Table_8.pdf [file Table_8.pdf]

Supplementary table VIII. Bacterial species detected by NGS in nine controls.

| C1                                  | C2                     | C3                          | C4                     | C5                          |      |                                 |      |                                     |      |
|-------------------------------------|------------------------|-----------------------------|------------------------|-----------------------------|------|---------------------------------|------|-------------------------------------|------|
| Number of reads:178739              | Number of reads:185748 | Number of reads:170630      | Number of reads:194306 | Number of reads:195484      |      |                                 |      |                                     |      |
| Sequences joined:93,5%              | Sequences joined:94,6% | Sequences joined:94,6%      | Sequences joined:94,8% | Sequences joined:95,5%      |      |                                 |      |                                     |      |
| <i>Methylobacteriaceae</i>          | 26.5                   | <i>Comamonadaceae</i>       | 19.2                   | <i>Methylobacteriaceae</i>  | 15.0 | <i>Methylobacteriaceae</i>      | 22.7 | <i>Methylobacteriaceae</i>          | 23.2 |
| <i>SMB53</i>                        | 7.4                    | <i>Methylobacteriaceae</i>  | 18.0                   | <i>Cupriavidus</i>          | 11.9 | <i>Cupriavidus</i>              | 15.7 | <i>Arthrobacter oxydans</i>         | 10.4 |
| <i>Prevotella stercorea</i>         | 7.4                    | <i>Bradyrhizobiaceae</i>    | 8.1                    | <i>Acidovorax defluvii</i>  | 8.5  | <i>Comamonadaceae</i>           | 7.9  | <i>Cupriavidus</i>                  | 7.3  |
| <i>Bifidobacterium adolescentis</i> | 7.2                    | <i>Cupriavidus</i>          | 6.4                    | <i>Sphingomonas</i>         | 7.7  | <i>Sphingomonadales</i>         | 6.8  | <i>Comamonadaceae</i>               | 6.4  |
| <i>Cupriavidus</i>                  | 5.8                    | <i>Dialister</i>            | 4.8                    | <i>Azospira</i>             | 6.8  | <i>Azospira</i>                 | 5.3  | <i>Paracoccus</i>                   | 6.0  |
| <i>Prevotella copri</i>             | 4.5                    | <i>Sphingomonas</i>         | 3.5                    | <i>Roseburia</i>            | 4.8  | <i>Bacteroidales</i>            | 4.4  | <i>Bifidobacterium adolescentis</i> | 5.8  |
| <i>Sutterella</i>                   | 3.6                    | <i>Methylobacterium</i>     | 3.2                    | <i>Acinetobacter</i>        | 3.2  | <i>Bradyrhizobiaceae</i>        | 3.5  | <i>Zoogloea</i>                     | 5.7  |
| <i>Bradyrhizobiaceae</i>            | 3.6                    | <i>Azospira</i>             | 3.1                    | <i>Prevotella copri</i>     | 3.1  | <i>Dorea</i>                    | 2.7  | <i>Bradyrhizobiaceae</i>            | 5.2  |
| <i>Anaerococcus</i>                 | 3.2                    | <i>Streptophyta</i>         | 2.5                    | <i>Pseudomonas fragi</i>    | 2.9  | <i>Christensenellaceae</i>      | 2.4  | <i>Acidovorax defluvii</i>          | 4.5  |
| <i>Roseburia</i>                    | 2.6                    | <i>Sedimentibacter</i>      | 2.2                    | <i>Ruminococcus</i>         | 2.9  | <i>Methylobacterium</i>         | 2.3  | <i>Azospira</i>                     | 3.6  |
| <i>Comamonadaceae</i>               | 2.6                    | <i>Carludovica palmata</i>  | 2.1                    | <i>Bradyrhizobiaceae</i>    | 2.8  | <i>Acidovorax defluvii</i>      | 2.1  | <i>Prevotella</i>                   | 3.1  |
| <i>Azospira</i>                     | 2.4                    | <i>Halomonas</i>            | 2.1                    | <i>Prevotella</i>           | 2.6  | <i>Rhodovarius lipocyclicus</i> | 1.8  | <i>Enhydrobacter</i>                | 2.9  |
| <i>Faecalibacterium prausnitzii</i> | 2.0                    | <i>MLE1-12</i>              | 1.9                    | <i>Ruminococcaceae</i>      | 2.4  | <i>Sphingomonas</i>             | 1.7  | <i>Citrobacter</i>                  | 1.9  |
| <i>Pseudomonas fragi</i>            | 1.9                    | <i>Bacteroides</i>          | 1.5                    | <i>Methylobacterium</i>     | 2.0  | <i>Veillonella dispar</i>       | 1.6  | <i>Comamonadaceae</i>               | 1.6  |
| <i>Sphingomonadales</i>             | 1.7                    | <i>Comamonadaceae</i>       | 1.4                    | <i>Sphingomonadales</i>     | 1.9  | <i>Propionibacterium acnes</i>  | 1.6  | <i>Methylobacterium</i>             | 1.4  |
| <i>Betaproteobacteria</i>           | 1.5                    | <i>Zoogloea</i>             | 1.2                    | <i>Prevotella stercorea</i> | 1.6  | <i>Anaerococcus</i>             | 1.4  | <i>Staphylococcus</i>               | 1.1  |
| <i>Bifidobacterium longum</i>       | 1.5                    | <i>Arthrobacter oxydans</i> | 1.2                    | <i>Anaerococcus</i>         | 1.4  | <i>Acetobacteraceae</i>         | 1.2  |                                     |      |
| <i>Nocardioideae</i>                | 1.3                    | <i>Corynebacterium</i>      | 1.2                    | <i>Rhizobiales</i>          | 1.3  | <i>Staphylococcus</i>           | 1.1  |                                     |      |
| <i>Sphingomonas</i>                 | 1.2                    | <i>Lachnospiraceae</i>      | 1.2                    | <i>Comamonadaceae</i>       | 1.3  | <i>Rhizobiales</i>              | 1.0  |                                     |      |
| <i>Faecalibacterium</i>             | 1.0                    | <i>Roseburia</i>            | 1.1                    | <i>Ellin6075</i>            | 1.1  |                                 |      |                                     |      |
|                                     |                        | <i>Lactobacillus iners</i>  | 1.0                    | <i>Corynebacterium</i>      | 1.0  |                                 |      |                                     |      |
|                                     |                        |                             |                        | <i>Rhizobiales</i>          | 1.0  |                                 |      |                                     |      |

| C6                                  | C7                     | C8                                  | C9                     |
|-------------------------------------|------------------------|-------------------------------------|------------------------|
| Number of reads:                    | Number of reads:178416 | Number of reads:1666641             | Number of reads:205914 |
| Sequences joined:95,2%              | Sequences joined:93,9% | Sequences joined:95,4%              | Sequences joined:93,8% |
| <i>Methylobacteriaceae</i>          | 17.0                   | <i>Methylobacteriaceae</i>          | 23.2                   |
| <i>Cupriavidus</i>                  | 14.0                   | <i>Azospira</i>                     | 14.4                   |
| <i>Bradyrhizobiaceae</i>            | 7.3                    | <i>Bradyrhizobiaceae</i>            | 5.6                    |
| <i>Lachnospiraceae</i>              | 5.5                    | <i>Cupriavidus</i>                  | 5.5                    |
| <i>Cerasicoccaceae</i>              | 5.5                    | <i>Sutterella</i>                   | 4.9                    |
| <i>Parabacteroides</i>              | 4.6                    | <i>Streptococcus</i>                | 4.6                    |
| <i>Zoogloea</i>                     | 4.3                    | <i>Comamonadaceae</i>               | 4.4                    |
| <i>Lachnospira</i>                  | 4.1                    | <i>Sphingomonadales</i>             | 4.2                    |
| <i>Comamonadaceae</i>               | 3.7                    | <i>Sphingomonas</i>                 | 4.1                    |
| <i>Acidovorax defluvii</i>          | 3.3                    | <i>Succinivibrio</i>                | 4.0                    |
| <i>Bacteroides</i>                  | 3.2                    | <i>Acidovorax defluvii</i>          | 3.6                    |
| <i>Faecalibacterium prausnitzii</i> | 2.9                    | <i>Staphylococcus</i>               | 2.2                    |
| <i>Prevotella copri</i>             | 2.6                    | <i>Arthrobacter oxydans</i>         | 2.0                    |
| <i>Azospira</i>                     | 2.6                    | <i>Zoogloea</i>                     | 1.7                    |
| <i>Clostridiales</i>                | 2.2                    | <i>Citrobacter</i>                  | 1.3                    |
| <i>Sphingomonadales</i>             | 1.7                    | <i>Corynebacterium</i>              | 1.1                    |
| <i>Rhodoplanes elegans</i>          | 1.5                    | <i>Propionibacterium acnes</i>      | 1.1                    |
| <i>Rhizobiales</i>                  | 1.5                    |                                     |                        |
| <i>Streptophyta</i>                 | 1.5                    |                                     |                        |
| <i>Comamonadaceae</i>               | 1.0                    |                                     |                        |
|                                     |                        | <i>Cupriavidus</i>                  | 16.2                   |
|                                     |                        | <i>Methylobacteriaceae</i>          | 10.9                   |
|                                     |                        | <i>Bradyrhizobiaceae</i>            | 10.3                   |
|                                     |                        | <i>Phaeospirillum</i>               | 6.9                    |
|                                     |                        | <i>Comamonadaceae</i>               | 5.8                    |
|                                     |                        | <i>Azospira</i>                     | 4.6                    |
|                                     |                        | <i>Prevotella copri</i>             | 4.4                    |
|                                     |                        | <i>Ruminococcaceae</i>              | 3.6                    |
|                                     |                        | <i>Bacteroides</i>                  | 3.5                    |
|                                     |                        | <i>Streptophyta</i>                 | 3.3                    |
|                                     |                        | <i>T78</i>                          | 2.9                    |
|                                     |                        | <i>Veillonella dispar</i>           | 2.3                    |
|                                     |                        | <i>Rhizobiales</i>                  | 2.2                    |
|                                     |                        | <i>Zoogloea</i>                     | 2.2                    |
|                                     |                        | <i>Sphingomonadales</i>             | 2.1                    |
|                                     |                        | <i>Arthrobacter oxydans</i>         | 1.9                    |
|                                     |                        | <i>Ralstonia</i>                    | 1.7                    |
|                                     |                        | <i>Bosea genosp</i>                 | 1.5                    |
|                                     |                        | <i>Corynebacterium</i>              | 1.4                    |
|                                     |                        | <i>Eubacterium bifforme</i>         | 1.3                    |
|                                     |                        | <i>Pseudomonas fragi</i>            | 1.0                    |
|                                     |                        | <i>Enterococcus cecorum</i>         | 31.1                   |
|                                     |                        | <i>Corynebacterium</i>              | 11.5                   |
|                                     |                        | <i>Planococcaceae</i>               | 6.7                    |
|                                     |                        | <i>Cloacibacterium</i>              | 5.9                    |
|                                     |                        | <i>Dokdonella</i>                   | 3.9                    |
|                                     |                        | <i>Sphingomonadales</i>             | 3.5                    |
|                                     |                        | <i>Microbacteriaceae</i>            | 3.5                    |
|                                     |                        | <i>Enhydrobacter</i>                | 3.0                    |
|                                     |                        | <i>EW055</i>                        | 2.8                    |
|                                     |                        | <i>Arthrobacter oxydans</i>         | 2.7                    |
|                                     |                        | <i>Planctomyces</i>                 | 2.5                    |
|                                     |                        | <i>SR1</i>                          | 2.4                    |
|                                     |                        | <i>Ruminococcus</i>                 | 2.2                    |
|                                     |                        | <i>Ralstonia</i>                    | 2.2                    |
|                                     |                        | <i>N09</i>                          | 1.5                    |
|                                     |                        | <i>Weeksellaceae</i>                | 1.5                    |
|                                     |                        | <i>Prevotella</i>                   | 1.4                    |
|                                     |                        | <i>Bifidobacterium adolescentis</i> | 1.2                    |
|                                     |                        | <i>Corynebacterium</i>              | 1.1                    |
|                                     |                        | <i>Rhodospirillaceae</i>            | 1.0                    |
